# Supplementary material
Source: PubMed Central journal article supplement (PMC5559158)

Lung function decline can be defined as the change in FEV<sub>1</sub> expressed in L/year as well as the change in the % predicted FEV<sub>1</sub> expressed as %/year. In this work, we explored if the different definitions have an impact on the results when classifying slow (change in FEV<sub>1</sub> (L/year) > -0.15 L or change in % predicted FEV<sub>1</sub> (%/year) > -4.4%) and fast (change in FEV<sub>1</sub> (l/year) < -0.15 L or change in % predicted FEV<sub>1</sub> (%/year) < -4.4%) decliners in lung function.

**Table 1SI. Linear Regression Analysis With lnDES Levels (Ng/Mg Creatinine) as Dependent Variable and Different Clinical Parameters as Independent Variables**

| Independent variable                                                                     | Dependent variable: lnDES (mean, standard deviation, number of subjects) | Model 1 $\beta$ (p-value) | Model 2 $\beta$ (p-value) |
|------------------------------------------------------------------------------------------|--------------------------------------------------------------------------|---------------------------|---------------------------|
| <b>Lung function decline expressed as change in FEV<sub>1</sub> (l/year)</b>             | <i>Controls</i>                                                          |                           |                           |
|                                                                                          | Slow (0.01, 0.13, 58) vs. fast decliners (-0.32, 0.15, 88)*              | -0.174 (0.036)            | -0.110 (0.134)            |
|                                                                                          | <i>COPD</i>                                                              |                           |                           |
|                                                                                          | Slow (0.03, 0.13, 107) vs. fast decliners (-0.32, 0.15, 111)*            | 0.001 (0.990)             | 0.024 (0.715)             |
|                                                                                          | <i>COPD current smokers</i>                                              |                           |                           |
|                                                                                          | Slow (0.01, 0.11, 38) vs. fast decliners (-0.35, 0.17, 55)               | 0.114 (0.276)             | 0.150 (0.134)             |
| <i>COPD former smokers</i>                                                               |                                                                          |                           |                           |
| Slow (0.05, 0.14, 69) vs. fast decliners (-0.29, 0.13, 56)                               | -0.101 (0.264)                                                           | -0.067 (0.427)            |                           |
| <b>Lung function decline expressed as change in % predicted FEV<sub>1</sub> (%/year)</b> | <i>Controls</i>                                                          |                           |                           |
|                                                                                          | Slow (1.75, 0.33, 57) vs. fast decliners (1.65, 0.36, 89)*               | -0.136 (0.101)            | -0.126 (0.080)            |
|                                                                                          | <i>COPD</i>                                                              |                           |                           |
|                                                                                          | Slow (1.87, 0.31, 96) vs. fast decliners (1.94, 0.42, 122)*              | 0.087 (0.198)             | 0.093 (0.144)             |
|                                                                                          | <i>COPD current smokers</i>                                              |                           |                           |
|                                                                                          | Slow (1.88, 0.28, 36) vs. fast decliners (1.98, 0.43, 57)                | 0.126 (0.229)             | 0.147 (0.141)             |
| <i>COPD former smokers</i>                                                               |                                                                          |                           |                           |
| Slow (1.87, 0.33, 60) vs. fast decliners (1.90, 0.42, 65)                                | 0.049 (0.586)                                                            | 0.085 (0.295)             |                           |

\* In these cases smoking habits are also included as correction factors

Model 1, independent variable = individual membership to group under investigation.

Model 2, independent variable = individual membership to group under investigation + gender, age and BMI as correction factors.

Standardized coefficient ( $\beta$ ) and corresponding regression significance ( $p$ -value) are shown in the table

**Figure 1SI. Box Plot Representation of lnDES Levels (Ng DES/Mg Creatinine) for Controls and COPD Individuals Grouped on the Basis of Lung Function Decline**

A. Lung function decline defined as change in FEV<sub>1</sub> (L/year)

B. Lung function decline defined as change in % predicted FEV<sub>1</sub> (%/year). Model 2-based  $p$ -values are displayed.

**A**

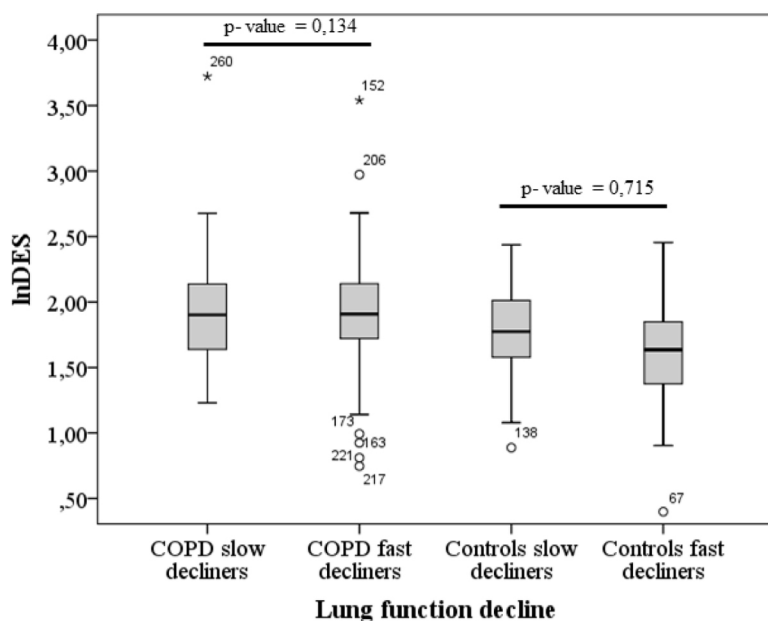

**B**

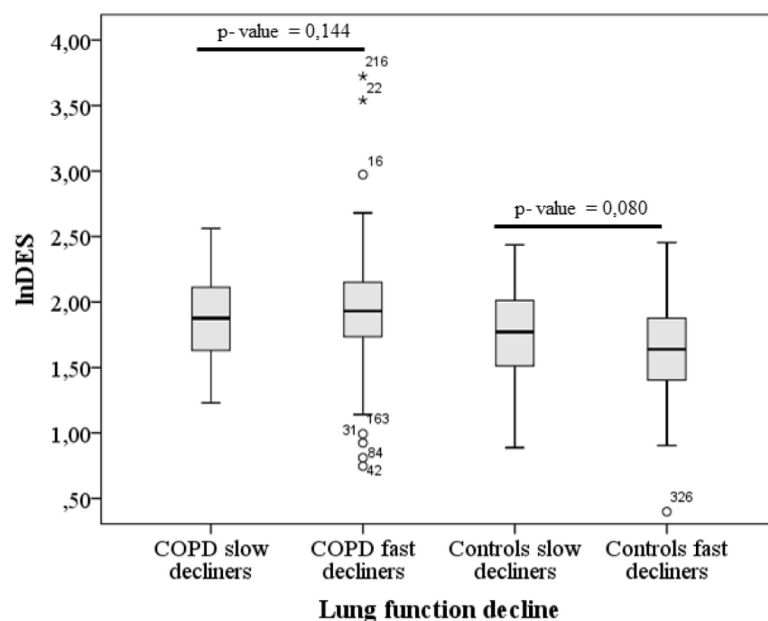

Supplement: JCOPDF-3-560-s001.pdf [file JCOPDF-3-560-s001.pdf]
